# Supplementary material
Source: MDPI journal article supplement (https://www.mdpi.com/2072-4292/13/13/2573)
Supplement: s1 [file s1]

# Supplementary Material

## Integrating aerial LiDAR and Very-High-Resolution images for urban functional zone mapping

Siji Sanlang <sup>1</sup>, Shisong Cao <sup>1,\*</sup>, Mingyi Du <sup>1</sup>, You Mo <sup>2</sup>, Qiang Chen <sup>1</sup> and Wen He <sup>1</sup>

<sup>1</sup> School of Geomatics and Urban Spatial Informatics, Beijing University of Civil Engineering and Architecture, Beijing 100044, China; 201804010206@stu.bucea.edu.cn (S.S.); dumingyi@bucea.edu.cn (M.D.); chen-qiang@bucea.edu.cn (Q.C.); 210813J120023@stu.bucea.edu.cn (W.H.)

<sup>2</sup> China Aero Geophysical Survey and Remote Sensing Center for Natural Resources, Beijing 100083, China; 2173601004@cnu.edu.cn

\* Correspondence: caoshisong@bucea.edu.cn

## Content

|                                                                                                               |    |
|---------------------------------------------------------------------------------------------------------------|----|
| Table S1 List of abbreviations.....                                                                           | 3  |
| Figure S1 3D USPs used for land cover mapping. ....                                                           | 5  |
| Figure S2 3D USPs used for UFZ mapping.....                                                                   | 6  |
| Table S2 Selected optimal variables for land cover mapping. ....                                              | 7  |
| Table S3 Confusion matrix of the land covers using RF algorithm. ....                                         | 8  |
| Table S4 Confusion matrix of the land covers using LDA algorithm.....                                         | 9  |
| Table S5 Confusion matrix of the land covers using KNN algorithm.....                                         | 10 |
| Table S6 Confusion matrix of land-cover classification using RF algorithm (only using 2D features).<br>.....  | 11 |
| Table S7 Confusion matrix of land-cover classification using KNN algorithm (only using 2D features).<br>..... | 12 |
| Table S8 Confusion matrix of land-cover classification using LDA algorithm (only using 2D features).<br>..... | 13 |
| Table S9 Selected optimal variables for UFZ mapping.....                                                      | 14 |
| Table S10 Confusion matrix of UFZ classification using RF algorithm. ....                                     | 15 |
| Table S11 Confusion matrix of UFZ classification using KNN algorithm.....                                     | 16 |
| Table S12 Confusion matrix of UFZ classification using LDA algorithm.....                                     | 17 |
| Table S13 UFZs classification accuracy of different variables combination.....                                | 18 |
| Software codes (partly) .....                                                                                 | 19 |

**Table S1 List of abbreviations**

| <b>Abbreviations</b> | <b>Definition</b>                                                         |
|----------------------|---------------------------------------------------------------------------|
| UFZ                  | Urban Functional Zone                                                     |
| 3D                   | three-dimensional                                                         |
| USP                  | Urban Structure Parameter                                                 |
| 2D                   | two-dimensional                                                           |
| VHR                  | Very-High-Resolution                                                      |
| LiDAR                | Light Detection And Ranging                                               |
| MLC                  | Multi-Classifer                                                           |
| RF                   | Random Forest                                                             |
| KNN                  | K-Nearest Neighbor                                                        |
| LDA                  | Linear Discriminant Analysis                                              |
| HSC                  | Hierarchical Semantic Cognition                                           |
| IHSC                 | Inverse Hierarchical Semantic Cognition                                   |
| OA                   | Overall Accuracy                                                          |
| POI                  | Point of Interest                                                         |
| SVF                  | Sky View Factor                                                           |
| BH                   | Building Height                                                           |
| SAR                  | Street Aspect Ratio                                                       |
| FAR                  | Floor Area Ratio                                                          |
| NYITS                | New York City Office of Information Technology Services                   |
| NYCDITT              | New York City Department of Information Technology and Telecommunications |
| DSM                  | Digital Surface Model                                                     |
| OSM                  | Open Street Map                                                           |
| NNI                  | Nearest Neighbor Index                                                    |
| NDVI                 | Normalized Difference Vegetation Index                                    |
| RVI                  | Ratio Vegetation Index                                                    |
| DVI                  | Difference Vegetation Index                                               |
| NDWI                 | Normalized Difference Water Index                                         |
| Mean. diff.          | Mean diff. to neighbor                                                    |
| Std. Dev             | Standard Deviation                                                        |
| GLCM                 | Gray-Level Co-occurrence Matrix                                           |
| GLDV                 | Grey Level Difference Vector                                              |
| B <sub>R</sub>       | Red Band                                                                  |
| B <sub>G</sub>       | Green Band                                                                |
| B <sub>B</sub>       | Blue Band                                                                 |
| B <sub>NIR</sub>     | Near-Infrared Band                                                        |
| GI                   | Gini Index                                                                |
| RB                   | Relative Border                                                           |
| DG                   | Distance to Grass                                                         |
| DB                   | Distance to Building                                                      |
| H                    | Height                                                                    |
| PA                   | Producer's Accuracy                                                       |
| UA                   | User's Accuracy                                                           |
| BC                   | Building Coverage                                                         |
| TC                   | Tree Coverage                                                             |
| GC                   | Grass Coverage                                                            |

|       |                                             |
|-------|---------------------------------------------|
| SC    | Soil Coverage                               |
| ISC_G | Impervious Surface Coverage at Ground level |
| WC    | Water Coverage                              |
| BNNI  | Building Nearest Neighbor Index             |
| TNNI  | Tree Nearest Neighbor Index                 |
| GNNI  | Grass Nearest Neighbor Index                |
| SNNI  | Soil Nearest Neighbor Index                 |
| INNI  | Impervious Ground Nearest Neighbor Index    |
| WNNI  | Water Nearest Neighbor Index                |
| Exp.  | Experiment                                  |

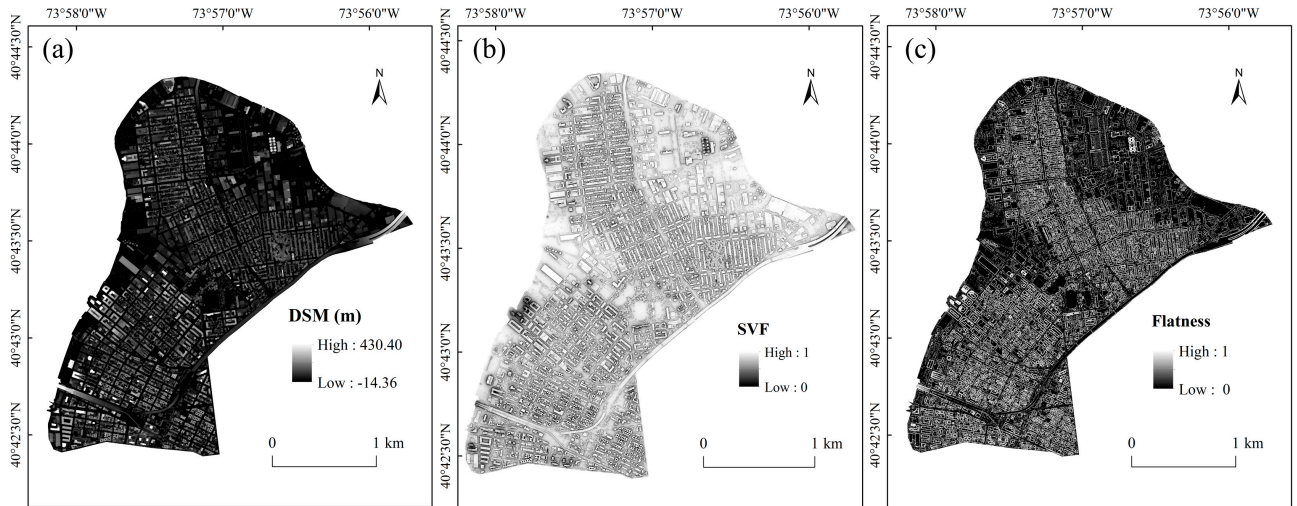

**Figure S1 3D USPs used for land cover mapping.**  
**(a) Digital Surface Model (DSM), (b) Sky View Factor (SVF) and (c) Flatness.**

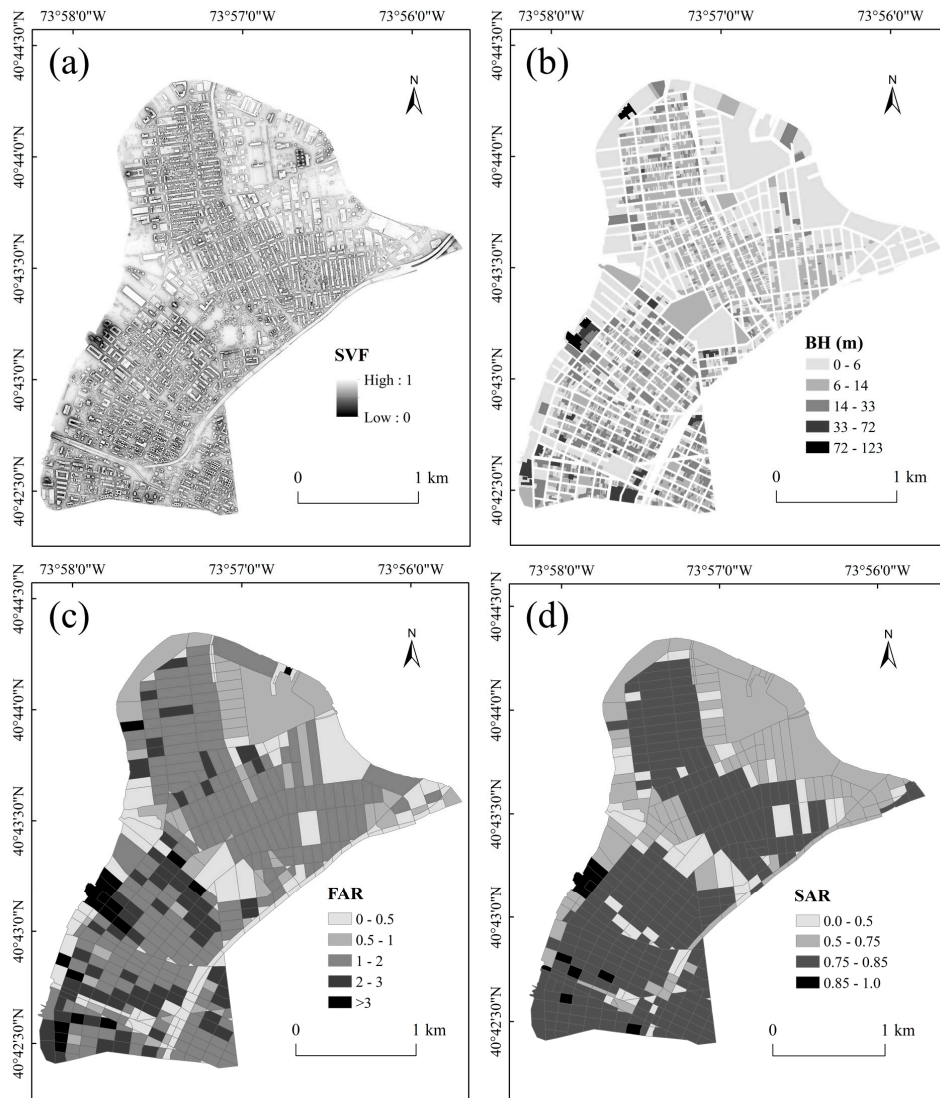

**Figure S2 3D USPs used for UFZ mapping.**

**(a) Sky View Factor (SVF), (b) Building Height (BH), (c) Floor Area Ratio (FAR) and (b) Street Aspect Ratio (SAR).**

**Table S2 Selected optimal variables for land cover mapping.**

| Category                 | Optimal feature                                                                                                                                              | Number |
|--------------------------|--------------------------------------------------------------------------------------------------------------------------------------------------------------|--------|
| Spectral feature         | $B_G$ , $B_B$ , $B_{NIR}$ , NDVI, RNI, DVI,<br>NDWI, $Mean_R$ , $Mean_G$ , $Mean_B$ ,<br>$Mean_{NIR}$ , Brightness, Ratio, Mean.<br>diff., Std. Dev $_{NIR}$ | 15     |
| Textural feature         | Variance $_{GLCM}$ , Correlation $_{GLCM}$ , En-<br>ergy $_{GLCM}$                                                                                           | 3      |
| Geometrical fea-<br>ture | Border Length, Length/Width, Main<br>Direction                                                                                                               | 3      |
| 3D USP                   | DSM, SVF, Flatness                                                                                                                                           | 3      |

**Table S3 Confusion matrix of the land covers using RF algorithm.**

| Category                  | Build-<br>ing | Tree | Grass | Soil | Impervious<br>ground | Water | UA (%)    |
|---------------------------|---------------|------|-------|------|----------------------|-------|-----------|
| Building                  | 1177          | 3    | 0     | 0    | 147                  | 2     | 88.6      |
| Tree                      | 5             | 334  | 36    | 0    | 2                    | 0     | 88.6      |
| Grass                     | 2             | 68   | 285   | 0    | 8                    | 0     | 78.5      |
| soil                      | 14            | 0    | 1     | 189  | 21                   | 0     | 84.0      |
| Impervi-<br>ous<br>ground | 180           | 2    | 7     | 35   | 1675                 | 3     | 88.1      |
| Water                     | 1             | 0    | 0     | 0    | 1                    | 63    | 96.9      |
| PA (%)                    | 85.4          | 82.1 | 86.6  | 84.4 | 90.3                 | 92.6  | 87.4 (OA) |



**Table S4 Confusion matrix of the land covers using LDA algorithm.**

| Category                  | Build-<br>ing | Tree | Grass | Soil | Impervious<br>ground | Water | UA (%)    |
|---------------------------|---------------|------|-------|------|----------------------|-------|-----------|
| Building                  | 1032          | 4    | 0     | 5    | 479                  | 3     | 67.8      |
| Tree                      | 26            | 296  | 56    | 0    | 6                    | 0     | 77.1      |
| Grass                     | 1             | 73   | 262   | 0    | 1                    | 0     | 77.7      |
| soil                      | 0             | 0    | 8     | 161  | 16                   | 2     | 86.1      |
| Impervi-<br>ous<br>ground | 317           | 34   | 3     | 57   | 1352                 | 12    | 76.2      |
| Water                     | 3             | 0    | 0     | 1    | 0                    | 51    | 92.7      |
| PA (%)                    | 74.8          | 72.7 | 79.6  | 71.9 | 72.9                 | 75.0  | 74.0 (OA) |

**Table S5 Confusion matrix of the land covers using KNN algorithm.**

| Category                  | Build-<br>ing | Tree | Grass | Soil | Impervious<br>ground | Water | UA (%)    |
|---------------------------|---------------|------|-------|------|----------------------|-------|-----------|
| Building                  | 1036          | 3    | 0     | 0    | 355                  | 0     | 74.3      |
| Tree                      | 18            | 305  | 59    | 0    | 9                    | 0     | 78.0      |
| Grass                     | 4             | 77   | 264   | 0    | 3                    | 0     | 75.4      |
| soil                      | 0             | 1    | 6     | 178  | 32                   | 0     | 82.0      |
| Impervi-<br>ous<br>ground | 320           | 21   | 0     | 45   | 1455                 | 8     | 78.7      |
| Water                     | 1             | 0    | 0     | 1    | 0                    | 61    | 96.7      |
| PA (%)                    | 75.1          | 74.9 | 80.2  | 79.5 | 78.5                 | 86.8  | 77.4 (OA) |

**Table S6 Confusion matrix of land cover classification using RF algorithm (only using 2D features).**

| Category                  | Build-<br>ing | Tree | Grass | Soil | Impervious<br>ground | Water | UA (%)    |
|---------------------------|---------------|------|-------|------|----------------------|-------|-----------|
| Building                  | 1112          | 1    | 0     | 4    | 169                  | 2     | 86.3      |
| Tree                      | 13            | 306  | 55    | 0    | 6                    | 0     | 80.5      |
| Grass                     | 0             | 93   | 268   | 0    | 2                    | 0     | 73.8      |
| Soil                      | 18            | 0    | 5     | 183  | 16                   | 0     | 82.4      |
| Impervi-<br>ous<br>ground | 235           | 7    | 1     | 37   | 1659                 | 4     | 85.4      |
| Water                     | 1             | 0    | 0     | 0    | 2                    | 62    | 95.4      |
| PA (%)                    | 80.6          | 75.2 | 81.5  | 81.7 | 89.5                 | 91.2  | 84.3 (OA) |

**Table S7 Confusion matrix of land cover classification using KNN algorithm  
(only using 2D features).**

| Category                  | Build-<br>ing | Tree | Grass | Soil | Impervious<br>ground | Water | UA (%)    |
|---------------------------|---------------|------|-------|------|----------------------|-------|-----------|
| Building                  | 1014          | 0    | 0     | 0    | 408                  | 4     | 71.1      |
| Tree                      | 14            | 274  | 65    | 0    | 1                    | 1     | 77.2      |
| Grass                     | 1             | 128  | 256   | 0    | 0                    | 0     | 66.5      |
| Soil                      | 0             | 2    | 5     | 174  | 18                   | 0     | 87.4      |
| Impervi-<br>ous<br>ground | 346           | 3    | 3     | 50   | 1424                 | 7     | 77.7      |
| Water                     | 4             | 0    | 0     | 0    | 3                    | 56    | 89.1      |
| PA (%)                    | 73.5          | 67.3 | 77.8  | 77.7 | 76.8                 | 83.8  | 75.1 (OA) |

**Table S8 Confusion matrix of land cover classification using LDA algorithm (only using 2D features).**

| Category                  | Build-<br>ing | Tree | Grass | Soil | Impervious<br>ground | Water | UA (%)    |
|---------------------------|---------------|------|-------|------|----------------------|-------|-----------|
| Building                  | 984           | 0    | 0     | 1    | 487                  | 4     | 66.6      |
| Tree                      | 13            | 273  | 65    | 0    | 26                   | 1     | 72.2      |
| Grass                     | 0             | 97   | 251   | 0    | 0                    | 0     | 72.1      |
| Soil                      | 0             | 1    | 9     | 163  | 47                   | 0     | 72.9      |
| Impervi-<br>ous<br>ground | 380           | 23   | 4     | 60   | 1293                 | 16    | 72.6      |
| Water                     | 2             | 13   | 0     | 0    | 1                    | 47    | 75.8      |
| PA (%)                    | 71.4          | 67.1 | 76.3  | 68.3 | 69.7                 | 73.5  | 70.5 (OA) |

**Table S9 Selected optimal variables for UFZ mapping.**

| Category        | Optimal feature                 | Number |
|-----------------|---------------------------------|--------|
| 2D USP          | BC, TC, GC, SC, ISC_G           | 5      |
| 3D USP          | SVF, BH, SAR, FAR               | 4      |
| Spatial pattern | BNNI, TNNI, GNNI, SNNI,<br>INNI | 5      |

**Table S10 Confusion matrix of UFZ classification using RF algorithm.**

| Category         | Commercial<br>zone | Residential<br>zone | Industrial<br>zone | Parks | UA (%)    |
|------------------|--------------------|---------------------|--------------------|-------|-----------|
| Commercial zone  | 26                 | 3                   | 3                  | 0     | 81.3      |
| Residential zone | 3                  | 87                  | 0                  | 0     | 96.7      |
| Industrial zone  | 0                  | 2                   | 44                 | 2     | 91.7      |
| Park             | 0                  | 0                   | 2                  | 14    | 87.5      |
| PA (%)           | 89.7               | 94.6                | 89.8               | 87.5  | 91.9 (OA) |

**Table S11 Confusion matrix of UFZ classification using KNN algorithm.**

| Category         | Commercial<br>zone | Residential<br>zone | Industrial<br>zone | Park | UA (%)    |
|------------------|--------------------|---------------------|--------------------|------|-----------|
| Commercial zone  | 21                 | 11                  | 2                  | 0    | 61.8      |
| Residential zone | 4                  | 73                  | 8                  | 1    | 84.9      |
| Industrial zone  | 4                  | 7                   | 36                 | 4    | 70.6      |
| Park             | 0                  | 1                   | 3                  | 11   | 73.3      |
| PA (%)           | 72.4               | 79.3                | 73.5               | 68.8 | 75.8 (OA) |



**Table S12 Confusion matrix of UFZ classification using LDA algorithm.**

| Category         | Commercial<br>zone | Residential<br>zone | Industrial<br>zone | Park | UA (%)    |
|------------------|--------------------|---------------------|--------------------|------|-----------|
| Commercial zone  | 22                 | 7                   | 1                  | 0    | 73.3      |
| Residential zone | 5                  | 82                  | 4                  | 1    | 89.1      |
| Industrial zone  | 2                  | 3                   | 42                 | 3    | 84.0      |
| Park             | 0                  | 0                   | 2                  | 12   | 85.7      |
| PA (%)           | 75.9               | 89.1                | 85.7               | 75.0 | 84.9 (OA) |

**Table S13 UFZs classification accuracy of different variables combination.**

| Category            | Exp. a<br>(%) | Exp. b<br>(%) | Exp. c<br>(%) | Exp. d<br>(%) | Exp. e<br>(%) | Exp. f<br>(%) | Exp. g<br>(%) |
|---------------------|---------------|---------------|---------------|---------------|---------------|---------------|---------------|
| Commercial<br>zone  | 63.6          | 54.5          | 45.5          | 72.7          | 81.8          | 54.5          | 89.7          |
| Residential<br>zone | 86.5          | 78.8          | 73.1          | 94.2          | 90.4          | 84.6          | 94.6          |
| Industrial zone     | 77.8          | 70.4          | 70.4          | 85.2          | 85.2          | 70.4          | 89.8          |
| Park zone           | 88.9          | 66.7          | 55.6          | 77.8          | 66.7          | 55.6          | 87.5          |
| OA                  | 81.8          | 72.7          | 67.7          | 87.9          | 85.9          | 74.7          | 91.9          |

## Software codes (Python platform)

```
from sklearn.ensemble import RandomForestClassifier
import osgeo
from osgeo import gdal
from osgeo import osr
from osgeo import ogr

import numpy as np
import pandas as pd
import matplotlib.pyplot as plt # a library for plotting
from sklearn.metrics import confusion_matrix
from sklearn.model_selection import train_test_split
from sklearn.datasets import load_boston
from sklearn.ensemble import RandomForestRegressor
from sklearn.inspection import permutation_importance

def readTif(fileName):
    dataset = gdal.Open(fileName)
    if dataset == None:
        print(fileName+"File cannot be opened")
        return
    im_width = dataset.RasterXSize
    im_height = dataset.RasterYSize
    im_bands = dataset.RasterCount
    im_data = dataset.ReadAsArray(0,0,im_width,im_height)
    im_geotrans = dataset.GetGeoTransform()
    im_proj = dataset.GetProjection()
    return im_width, im_height, im_bands,im_data,im_geotrans,im_proj

def writeTiff(im_data,im_width,im_height,im_bands,im_geotrans,im_proj,path):
    if 'int8' in im_data.dtype.name:
        datatype = gdal.GDT_Byte
    elif 'int16' in im_data.dtype.name:
        datatype = gdal.GDT_UInt16
    else:
        datatype = gdal.GDT_Float32

    if len(im_data.shape) == 3:
        im_bands, im_height, im_width = im_data.shape
    elif len(im_data.shape) == 2:
        im_data = np.array([im_data])
    else:
        im_bands, (im_height, im_width) = 1,im_data.shape
        driver = gdal.GetDriverByName("GTiff")
    dataset = driver.Create(path, im_width, im_height, im_bands, datatype)
    if(dataset!= None):
        dataset.SetGeoTransform(im_geotrans)
```

```

        dataset.SetProjection(im_proj)
    for i in range(im_bands):
        dataset.GetRasterBand(i+1).WriteArray(im_data[i])
    del dataset

work_path = 'D:/Geo/all_feature'      # Define your work path
sample_path = work_path + '/' + 'features.csv'

sample = np.array(pd.read_csv(sample_path, dtype='float32'))
X_sample = sample[:,1:44]
Y_sample = sample[:,0]

x_train,x_test,y_train,y_test=train_test_split(X_sample,Y_sample,test_size=0.2,random_state=40)

# Parameters
num_trees = 100
max_depth = None      # If none, nodes are expanded until all leaves are pure.
max_features = 'sqrt'  # then max_features=sqrt(n_features)

rf = RandomForestClassifier(n_estimators=num_trees, max_depth=max_depth,
max_features=max_features)

# Fit the model
rf.fit(x_train, y_train)

# Check the importance
print(rf.feature_importances_)
sorted_idx = rf.feature_importances_.argsort()
plt.barh(range(x_train.shape[1]),rf.feature_importances_[sorted_idx])
plt.xlabel("Random Forest Feature Importance")
plt.show()

# Prediction of calibration dataset
y_pred_cali = rf.predict(x_train)
CM = confusion_matrix(y_pred_cali,y_train)
acc = np.trace(CM) / len(y_train)
print(CM, 'overall accuracy for cali: ', acc)

# Prediction of valibration dataset
y_pred_vali = rf.predict(x_test)
CM = confusion_matrix(y_pred_vali,y_test)
acc = np.trace(CM) / len(y_test)
print(CM, 'overall accuracy for vali: ', acc)
print("complete")

```
